# Supplementary material
Source: PubMed Central journal article supplement (PMC3472040)
Supplement: NIHMS402676-supplement-Supp_Fig_S1-S2.pdf [file NIHMS402676-supplement-Supp_Fig_S1-S2.pdf]

# Suppl Fig. 1

a

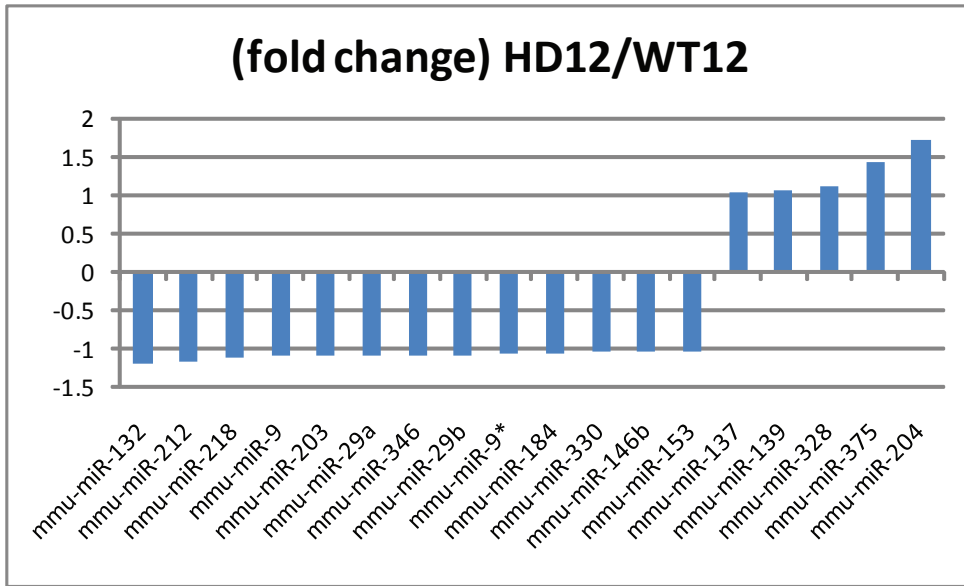

b

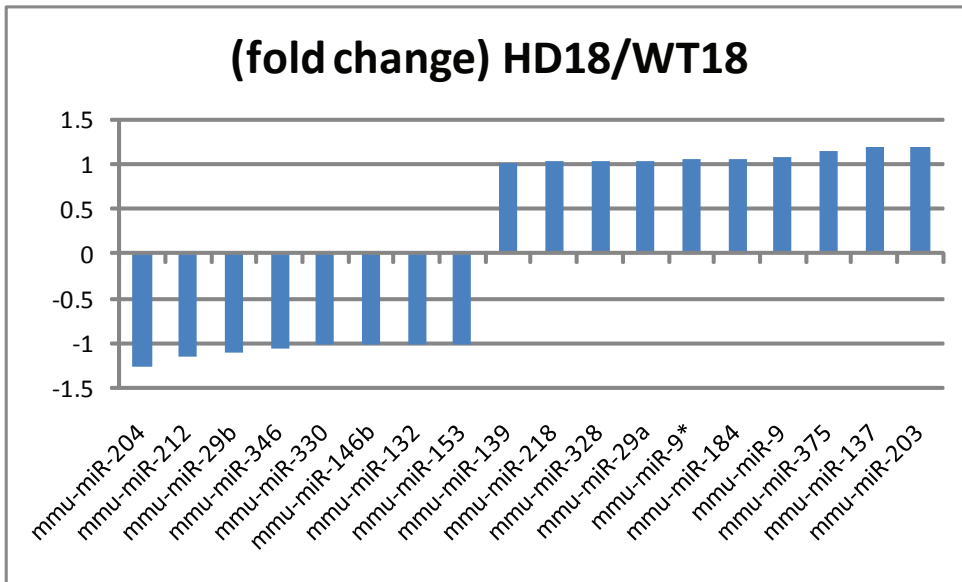

**Supplemental Fig. 1.** Levels of REST-regulated miRNAs in the cerebral cortex of N171-82Q HD mice at indicated ages.

## Suppl Fig.2

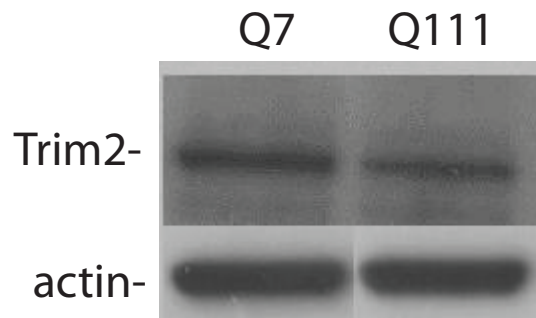

Supplemental Fig. 2. Trim2 protein levels are decreased in cells expressing mutant HTT HdhQ111/Q111 cells compared to those in cells expressing normal HTT HdhQ7/Q7 cells. Immortalized striatal cells ( gift from Dr. Marcy Macdonald lab) were cultured in serum-free DMEM medium for 24 hrs, cells were collected and homogenized for Western blots.
